# Supplementary material
Source: PubMed Central journal article supplement (PMC5726568)
Supplement: NIHMS909826-supplement-3.pdf [file NIHMS909826-supplement-3.pdf]

1 **Supplementary Information**2 **Table 1 – Primers qPCR blood vessels**

| Gene         | Ref Seq #       | Assay ID            | Forward primer                             | Reverse primer            |
|--------------|-----------------|---------------------|--------------------------------------------|---------------------------|
| PECAM1       | NM_008816(2)    | Mm.PT.58.43167370   | PrimeTime®qPCR primers Exon Location 7-8   |                           |
| CDH5         | NM_009868(1)    | Mm.PT.58.8747496    | PrimeTime®qPCR primers Exon Location 7-8   |                           |
| FGF2         | NM_008006(1)    | Mm.PT.56a.5129235   | PrimeTime®qPCR primers Exon Location 1-3   |                           |
| ANGPT2       | NM_007426(1)    | Mm.PT.58.29139310   | PrimeTime®qPCR primers Exon Location 1a-2  |                           |
| VEGFA        | NM_009505(3)    | Mm.PT.58.14200306   | PrimeTime®qPCR primers Exon Location 1-2   |                           |
| CLDN1        | NM_016674(1)    | Mm.PT.58.41579102   | PrimeTime®qPCR primers Exon Location 2-3   |                           |
| CLDN3        | NM_009902(1)    | Mm.PT.58.43310459.g | PrimeTime®qPCR primers Exon Location 1-1   |                           |
| CLDN5        | NM_013805(1)    |                     | 5'-TTTCTTCTATGCGCAGTTGG-3'                 | 5'-GCAGTTTGGTGCTACTTCA-3' |
| CLDN12       | NM_001193659(3) | Mm.PT.58.41535303   | PrimeTime®qPCR primers Exon Location 3a-5  |                           |
| TJP1         | NM_001163574(2) | Mm.PT.58.29459730   | PrimeTime®qPCR primers Exon Location 18-19 |                           |
| TJP2         | NM_001198985(2) | Mm.PT.58.16834535   | PrimeTime®qPCR primers Exon Location 22-23 |                           |
| TJP3         | NM_013769(1)    | Mm.PT.58.43961106   | PrimeTime®qPCR primers Exon Location 15-17 |                           |
| OCLN         | NM_008756(1)    | Mm.PT.58.42749240   | PrimeTime®qPCR primers Exon Location 7-9   |                           |
| MARVELD2     | NM_001038602(2) | Mm.PT.58.7719303    | PrimeTime®qPCR primers Exon Location 5-7   |                           |
| MFSD2A       | NM_029662(1)    | Mm.PT.58.32675283   | PrimeTime®qPCR primers Exon Location 13-14 |                           |
| NTN1         | NM_008744(1)    | Mm.PT.58.41162316   | PrimeTime®qPCR primers Exon Location 3-4   |                           |
| IL1 $\beta$  | NM_008361(1)    | Mm.PT.58.41616450   | PrimeTime®qPCR primers Exon Location 3-4   |                           |
| IL6          | NM_031168(1)    | Mm.PT.58.10005566   | PrimeTime®qPCR primers Exon Location 4-5   |                           |
| TNF $\alpha$ | NM_013693(1)    | Mm.PT.58.12575861   | PrimeTime®qPCR primers Exon Location 2-4   |                           |
| CXCL1        | NM_008176(1)    | Mm.PT.58.42076891   | PrimeTime®qPCR primers Exon Location 2-4   |                           |
| CXCL12       | NM_013655(3)    | Mm.PT.58.8366748    | PrimeTime®qPCR primers Exon Location 1-2   |                           |
| CCL2         | NM_011333(1)    | Mm.PT.58.42151692   | PrimeTime®qPCR primers Exon Location 1-3   |                           |
| CCL3         | NM_011337(1)    | Mm.PT.58.29283216   | PrimeTime®qPCR primers Exon Location 1-2   |                           |
| CCR2         | NM_009915(1)    | Mm.PT.58.14116710   | PrimeTime®qPCR primers Exon Location 1-3   |                           |
| GAPDH        | NM_008084(1)    | Mm.PT.39a.1         | PrimeTime®qPCR primers Exon Location 2-3   |                           |

3

4 **Table 2 – Complete demographic for human cohorts**5 *Montreal cohort*

| Gender | Age | Post mortem interval | Cause of death | Depressive symptoms | History of abuse | Antidepressant treatment | Alcohol | Drugs of abuse |
|--------|-----|----------------------|----------------|---------------------|------------------|--------------------------|---------|----------------|
| M      | 47  | 12                   | Natural        | No                  | No               | No                       | No      | No             |
| M      | 41  | 24                   | Natural        | No                  | No               | No                       | No      | No             |
| M      | 30  | 30                   | Accident       | No                  | No               | No                       | No      | No             |
| M      | 19  | 27.75                | Suicide        | No                  | N/A              | No                       | No      | No             |
| M      | 46  | 19.5                 | Natural        | No                  | No               | No                       | No      | No             |
| M      | 32  | 29.5                 | Accident       | No                  | N/A              | No                       | No      | No             |
| M      | 33  | 18                   | Suicide        | No                  | Yes              | No                       | No      | No             |
| M      | 42  | 63                   | Accident       | No                  | N/A              | No                       | No      | No             |
| M      | 55  | 24                   | Accident       | No                  | Yes              | No                       | No      | No             |
| M      | 46  | 59                   | Suicide        | No                  | N/A              | No                       | No      | No             |
| M      | 52  | 10                   | Natural        | No                  | N/A              | No                       | No      | No             |
| M      | 29  | 4                    | Suicide        | No                  | N/A              | No                       | No      | No             |
| M      | 59  | 23.5                 | Accident       | No                  | N/A              | No                       | No      | No             |
| F      | 66  | 61                   | Accident       | No                  | N/A              | No                       | Yes     | No             |

|   |    |      |          |     |     |     |     |    |
|---|----|------|----------|-----|-----|-----|-----|----|
| F | 72 | 17   | Natural  | No  | No  | No  | No  | No |
| F | 45 | 44   | Suicide  | No  | Yes | Yes | No  | No |
| F | 81 | 13.5 | Natural  | No  | N/A | No  | No  | No |
| F | 78 | 7.5  | Accident | No  | Yes | No  | Yes | No |
| F | 76 | 7    | Accident | No  | No  | Yes | No  | No |
| F | 68 | 8.5  | Natural  | No  | N/A | No  | No  | No |
|   |    |      |          |     |     |     |     |    |
| M | 49 | 2.5  | Suicide  | Yes | No  | No  | No  | No |
| M | 53 | 33.5 | Suicide  | Yes | Yes | No  | No  | No |
| M | 38 | 30   | Suicide  | Yes | N/A | No  | No  | No |
| M | 28 | 36   | Suicide  | Yes | N/A | No  | No  | No |
| M | 29 | 27   | Suicide  | Yes | No  | No  | No  | No |
| M | 68 | 43   | Suicide  | Yes | N/A | No  | No  | No |
| M | 63 | 50   | Suicide  | Yes | N/A | No  | No  | No |
| M | 48 | 49   | Suicide  | Yes | No  | No  | No  | No |
| M | 67 | 56   | Suicide  | Yes | N/A | No  | No  | No |
| M | 52 | 29   | Suicide  | Yes | N/A | No  | No  | No |
| M | 53 | 14   | Suicide  | Yes | N/A | No  | No  | No |
| M | 51 | 54   | Suicide  | Yes | N/A | No  | No  | No |
| M | 39 | 25.5 | Suicide  | Yes | N/A | No  | No  | No |
| M | 49 | 32   | Suicide  | Yes | N/A | No  | No  | No |
| M | 40 | 22   | Suicide  | Yes | N/A | No  | No  | No |
| F | 25 | 20   | Suicide  | Yes | N/A | No  | No  | No |
| F | 55 | 36   | Suicide  | Yes | No  | No  | No  | No |
| F | 25 | 56   | Suicide  | Yes | N/A | No  | No  | No |
| F | 32 | 41   | Suicide  | Yes | N/A | No  | No  | No |
| F | 55 | 2.5  | Suicide  | Yes | Yes | No  | No  | No |
| F | 44 | 60   | Suicide  | Yes | N/A | No  | No  | No |
|   |    |      |          |     |     |     |     |    |
| M | 42 | 21   | Suicide  | Yes | Yes | Yes | No  | No |
| M | 48 | 21.5 | Suicide  | Yes | N/A | Yes | No  | No |
| M | 22 | 24   | Suicide  | Yes | Yes | Yes | No  | No |
| M | 53 | 41   | Suicide  | Yes | No  | Yes | No  | No |
| M | 36 | 36.5 | Suicide  | Yes | N/A | Yes | No  | No |
| M | 63 | 24   | Suicide  | Yes | N/A | Yes | No  | No |
| M | 35 | 31   | Suicide  | Yes | N/A | Yes | No  | No |
| M | 47 | 2.5  | Suicide  | Yes | N/A | Yes | No  | No |
| F | 46 | 15   | Suicide  | Yes | N/A | Yes | Yes | No |
| F | 40 | 49.5 | Suicide  | Yes | N/A | Yes | No  | No |
| F | 54 | 28.5 | Suicide  | Yes | Yes | Yes | No  | No |
| F | 49 | 14.5 | Suicide  | Yes | N/A | Yes | No  | No |
| F | 36 | 7.5  | Suicide  | Yes | No  | Yes | No  | No |
| F | 55 | 36   | Suicide  | Yes | N/A | Yes | No  | No |
| F | 59 | 3    | Suicide  | Yes | No  | Yes | No  | No |

6

7

*Texas cohort*

| Gender | Age | Post mortem interval | Cause of death                      |
|--------|-----|----------------------|-------------------------------------|
| M      | 31  | 16                   | Hypertensive cardiovascular disease |
| M      | 63  | 14                   | Acute myocardial infarction         |
| M      | 19  | 20                   | Gunshot wound                       |
| M      | 48  | 15                   | Mitral valve regurgitation          |

|   |    |      |                                         |
|---|----|------|-----------------------------------------|
| M | 20 | 21   | Blunt force injury                      |
| M | 60 | 20   | Surgical complication                   |
| M | 43 | 15   | Hypertensive cardiovascular disease     |
| M | 60 | 11   | Hypertensive cardiovascular disease     |
| M | 63 | 12   | Acute myocardial infection              |
| M | 34 | 23   | Artherosclerotic cardiovascular disease |
| M | 48 | 20   | Artherosclerotic cardiovascular disease |
| M | 54 | 11.4 | Hypertensive cardiovascular disease     |
| M | 77 | 13.4 | Pancreatic cancer                       |
| M | 60 | 27   | Acute myocardial infarction             |

8

| Gender | Age | Post mortem interval | Antidepressant treatment | Cause of death |
|--------|-----|----------------------|--------------------------|----------------|
| M      | 25  | 21                   | No                       | Suicide        |
| M      | 42  | 17                   | No                       | Suicide        |
| M      | 24  | 18                   | No                       | Suicide        |
| M      | 18  | 22                   | No                       | Suicide        |
| M      | 61  | 19                   | No                       | Suicide        |

9

| Gender | Age | Post mortem interval | Antidepressant treatment | Cause of death                      |
|--------|-----|----------------------|--------------------------|-------------------------------------|
| M      | 33  | 18                   | Yes                      | Suicide                             |
| M      | 40  | 18                   | Yes                      | Suicide                             |
| M      | 35  | 9                    | Yes                      | Suicide                             |
| M      | 61  | 20                   | Yes                      | Suicide                             |
| M      | 50  | 23                   | Yes                      | Suicide                             |
| M      | 65  | 14                   | Yes                      | Hypertensive cardiovascular disease |

10

### 11 Table 3 – Human qPCR primers

| Gene  | Ref Seq #    | Assay ID           | Primers                                  |
|-------|--------------|--------------------|------------------------------------------|
| CLDN5 | NM_003277(2) | Hs.PT.58.1483777.g | PrimeTime®qPCR primers Exon Location 1-1 |
| GAPDH | NM_002046(1) | Hs.PT.39a.22214836 | PrimeTime®qPCR primers Exon Location 2-3 |

12

### 13 Table 4 – Primers qPCR viruses validation

| Gene   | Ref Seq #       | Assay ID            | Forward primer                             | Reverse primer            |
|--------|-----------------|---------------------|--------------------------------------------|---------------------------|
| CLDN1  | NM_016674(1)    | Mm.PT.58.41579102   | PrimeTime®qPCR primers Exon Location 2-3   |                           |
| CLDN3  | NM_009902(1)    | Mm.PT.58.43310459.g | PrimeTime®qPCR primers Exon Location 1-1   |                           |
| CLDN5  | NM_013805(1)    |                     | 5'-TTTCTTCTATGCGCAGTTGG-3'                 | 5'-GCAGTTTGGTGCTACTTCA-3' |
| CLDN12 | NM_001193659(3) | Mm.PT.58.41535303   | PrimeTime®qPCR primers Exon Location 3a-5  |                           |
| PECAM1 | NM_008816(2)    | Mm.PT.58.43167370   | PrimeTime®qPCR primers Exon Location 7-8   |                           |
| PDGFRβ | NM_001146268(2) | Mm.PT.56a.5869521   | PrimeTime®qPCR primers Exon Location 23-24 |                           |
| GFAP   | NM_001131020(2) | Mm.PT.58.6609337    | PrimeTime®qPCR primers Exon Location 6-7   |                           |
| S100β  | NM_009115(1)    | Mm.PT.58.30112765   | PrimeTime®qPCR primers Exon Location 2-3   |                           |
| RAC1   | NM_009007(1)    | Mm.PT.58.8517513    | PrimeTime®qPCR primers Exon Location 1-2   |                           |
| GAPDH  | NM_008084(1)    | Mm.PT.39a.1         | PrimeTime®qPCR primers Exon Location 2-3   |                           |

14
